# Supplementary material for: Towards the design of a mixture of diether and succinate as an internal donor in a MgCl2-supported Ziegler–Natta catalyst
Source: Royal Society of Chemistry journal article supplement (doi:10.1039/d0nj02676j), 2020-01-01
Supplement: d0nj02676j3.pdf [file d0nj02676j3.pdf]

## Supporting Information

### **Towards the design of mixture of diether and succinate as internal donor in MgCl<sub>2</sub> supported Ziegler Natta catalyst**

Nona Ghasemi Hamedani <sup>1,2</sup>, Hassan Arabi\*<sup>1</sup> and Fatemeh Poorsank <sup>1,2</sup>

1) Department of Polymerization Engineering, Iran Polymer and Petrochemical Institute,

P.O. Box: 14965/115, Tehran, Iran

2) National Petrochemical Company-Research & Technology Co. (NPC-RT), Tehran, Iran

Corresponding e-mail: [h.arabi@ippi.ac.ir](mailto:h.arabi@ippi.ac.ir), Tel ++98 2144787024

Table S1. Results of deconvolution by Flory components

| Sample       | Site 1  |         | Site 2 |       | Site 3 |        | Site 4 |        |
|--------------|---------|---------|--------|-------|--------|--------|--------|--------|
|              | $F_r^a$ | $M_w^b$ | $F_r$  | $M_w$ | $F_r$  | $M_w$  | $F_r$  | $M_w$  |
| Catalyst B   | 10.17   | 17.85   | 45.46  | 57.66 | 32.89  | 124.22 | 11.48  | 245.3  |
| Catalyst BD1 | 10.76   | 21.24   | 49.07  | 65.59 | 32.62  | 150.89 | 7.55   | 332.95 |
| Catalyst BD2 | 12.45   | 25.67   | 47.71  | 73.17 | 31.07  | 177.96 | 8.77   | 463.37 |
| Catalyst BD3 | 13.65   | 26.8    | 46.1   | 76.8  | 30.84  | 174.08 | 9.5    | 483.7  |
| Catalyst D   | 15.77   | 22.38   | 41.64  | 71.57 | 32.65  | 189.5  | 9.94   | 535.25 |

<sup>a</sup> $F_r$  was the weight percentage of the fraction produced by a certain active centre in catalyst.

<sup>b</sup> Weight average molecular weight, in  $10^4$  g/mol

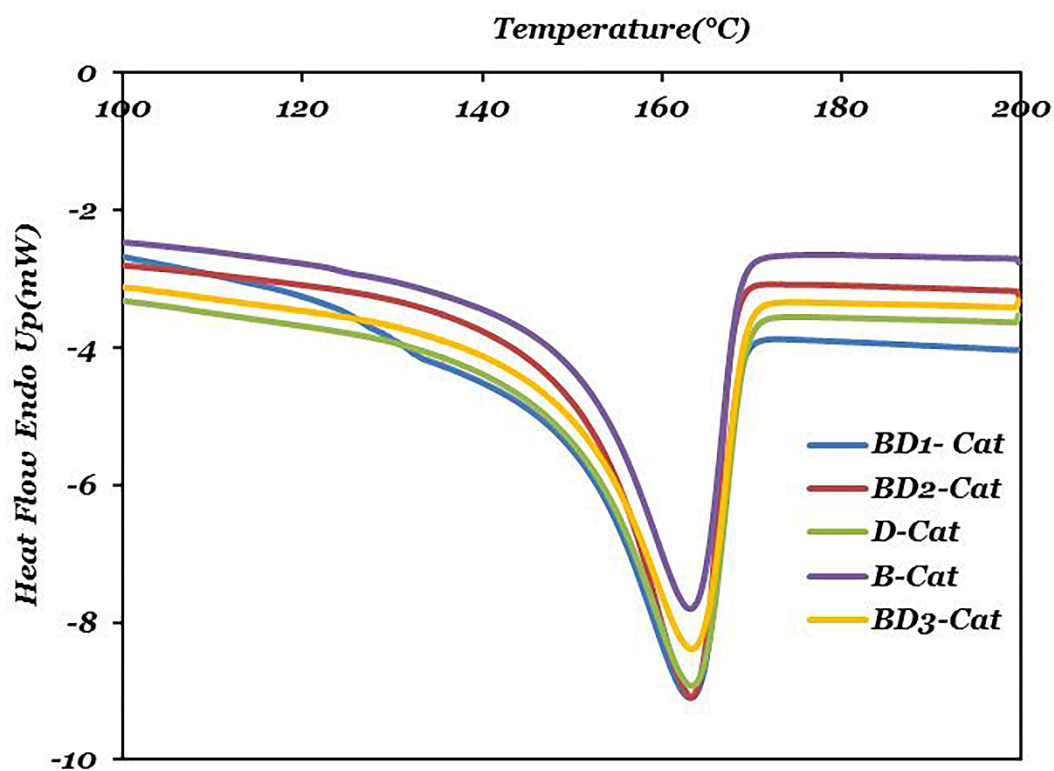

Figure S1. The DSC melting curve of polypropylene prepared by catalysts

Table S2. The optimal range of  $T_s$  of each sample prepared by catalysts

| <b>Sample</b> | <b>Domain I</b> | <b>Domain II</b>     | <b>Domain III</b> | <b><math>T_s</math> (°C)</b> |
|---------------|-----------------|----------------------|-------------------|------------------------------|
| Catalyst B    | $T_s > 179$     | $163 < T_s \leq 179$ | $T_s \leq 163$    | 164                          |
| Catalyst BD1  | $T_s > 181$     | $163 < T_s \leq 181$ | $T_s \leq 163$    | 164                          |
| Catalyst BD2  | $T_s > 181$     | $164 < T_s \leq 181$ | $T_s \leq 164$    | 165                          |
| Catalyst BD3  | $T_s > 180$     | $163 < T_s \leq 180$ | $T_s \leq 163$    | 164                          |
| Catalyst D    | $T_s > 181$     | $164 < T_s \leq 181$ | $T_s \leq 164$    | 165                          |

Table S3. The relative contents of all peaks of all samples after SSA thermal fractionation

| <b>Sample</b> | <b><math>n_1</math></b> | <b><math>n_2</math></b> | <b><math>n_3</math></b> | <b><math>n_4</math></b> | <b><math>n_5</math></b> |
|---------------|-------------------------|-------------------------|-------------------------|-------------------------|-------------------------|
| Catalyst B    | 38.78                   | 29.6                    | 17.98                   | 8.57                    | 5.05                    |
| Catalyst BD1  | 54.48                   | 15.33                   | 18.01                   | 7.96                    | 4.19                    |
| Catalyst BD2  | 43.70                   | 24.89                   | 17.70                   | 8.77                    | 4.92                    |
| Catalyst BD3  | 44.31                   | 27.22                   | 18.10                   | 8.48                    | 4.49                    |
| Catalyst D    | 39.81                   | 28.72                   | 18.22                   | 8.43                    | 4.65                    |
