# Supplementary figures and images for: Towards the design of a mixture of diether and succinate as an internal donor in a MgCl2-supported Ziegler–Natta catalyst
Source: Royal Society of Chemistry journal article supplement (doi:10.1039/d0nj02676j), 2020-01-01

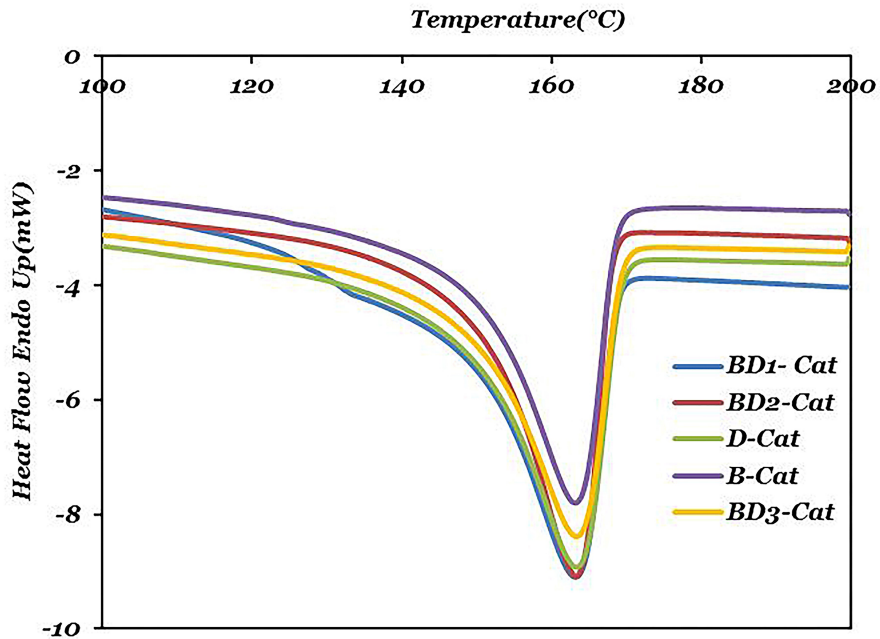

Supplement: d0nj02676j2.pdf [file d0nj02676j2.pdf]
